# Supplementary material for: Factors associated with shisha smoking: a cross-sectional telephone-based survey among general population adults in Nigeria
Source: bioRxiv or medRxiv preprint supplement (doi:10.1101/2024.02.27.24303237), 2024-02-28
Supplement: Supplementary file [file media-1.pdf]

**Supplemental material 1: Factors associated with shisha smoking by sex**

|                           | <b>Males</b>         |                            | <b>Females</b>        |                            |
|---------------------------|----------------------|----------------------------|-----------------------|----------------------------|
| <b>Variable</b>           | <b>cOR (95% CI)</b>  | <b>aOR (95% CI)</b>        | <b>cOR (95% CI)</b>   | <b>aOR (95% CI)</b>        |
| <b>Age</b>                | 0.90 (0.88 to 0.93)  | <b>0.92 (0.90 to 0.95)</b> | 0.89 (0.85 to 0.93)   | <b>0.90 (0.82 to 0.98)</b> |
| <b>Urban/rural</b>        |                      |                            |                       |                            |
| Rural                     | 1                    | 1                          | 1                     | 1                          |
| Urban                     | 1.64 (0.89 to 3.02)  | 1.17 (0.59 to 2.31)        | 1.70 (0.86 to 3.38)   | 2.30 (0.39 to 13.68)       |
| <b>Level of education</b> |                      |                            |                       |                            |
| No education              | 1                    | 1                          | 1                     | 1                          |
| Primary                   | 0.83 (0.18 to 3.89)  | 0.32 (0.05 to 2.13)        | 2.53 (0.24 to 26.78)  | 0.93 (0.10 to 8.91)        |
| ≥ Secondary               | 9.04 (2.64 to 30.87) | 0.46 (0.20 to 1.06)        | 10.86 (1.43 to 82.73) | 0.37 (0.02 to 6.71)        |
| <b>Religion</b>           |                      |                            |                       |                            |
| Christianity              | 1                    | 1                          | 1                     | 1                          |
| Islam                     | 0.68 (0.50 to 0.94)  | 0.91 (0.65 to 1.27)        | 0.32 (0.16 to 0.65)   | 0.85 (0.35 to 2.04)        |
| None                      | 0.75 (0.28 to 2.00)  | 0.75 (0.18 to 3.22)        | 1.70 (0.12 to 24.17)  | 0.68 (0.06 to 7.41)        |
| <b>Wealth quintile</b>    |                      |                            |                       |                            |

|                                                      |                      |                             |                       |                             |
|------------------------------------------------------|----------------------|-----------------------------|-----------------------|-----------------------------|
| Poorest                                              | 1                    | 1                           | 1                     | 1                           |
| Poorer                                               | 0.49 (0.36 to 0.68)  | 0.83 (0.44 to 1.60)         | 0.62 (0.39 to 0.98)   | 0.78 (0.26 to 2.39)         |
| Middle                                               | 0.48 (0.28 to 0.81)  | 0.68 (0.34 to 1.37)         | 0.20 (0.03 to 1.52)   | 0.37 (0.11 to 1.22)         |
| Richer                                               | 0.25 (0.16 to 0.39)  | <b>0.39 (0.17 to 0.88)</b>  | 0.12 (0.05 to 0.33)   | 0.43 (0.07 to 2.60)         |
| Richest                                              | 0.10 (0.06 to 0.17)  | 0.35 (0.11 to 1.12)         | 0.17 (0.08 to 0.38)   | 1.85 (0.12 to 27.69)        |
| <b>Employment status</b>                             |                      |                             |                       |                             |
| Unemployed                                           | 1                    | 1                           | 1                     | 1                           |
| Employed                                             | 1.63 (0.54 to 4.89)  | <b>2.53 (1.09 to 5.89)</b>  | 2.02 (0.94 to 4.34)   | 0.79 (0.09 to 6.71)         |
| Student                                              | 3.73 (1.22 to 11.38) | <b>3.85 (1.43 to 10.41)</b> | 5.13 (1.76 to 14.98)  | 0.84 (0.18 to 4.06)         |
| Apprentice                                           | 1.38 (0.75 to 2.54)  | 2.77 (0.77 to 9.96)         | 1.47 (0.86 to 2.50)   | 0.09 (0.00 to 4.27)         |
| <b>At least one family member smokes shisha</b>      |                      |                             |                       |                             |
| No                                                   | 1                    | 1                           | 1                     | 1                           |
| Yes                                                  | 9.40 (4.02 to 22.01) | <b>2.23 (1.16 to 4.29)</b>  | 13.58 (6.31 to 29.25) | <b>4.91 (0.88 to 27.26)</b> |
| <b>Number of shisha smokers among closet friends</b> |                      |                             |                       |                             |
| 0                                                    | 1                    | 1                           | 1                     | 1                           |

|                                   |                          |                                |                           |                                  |
|-----------------------------------|--------------------------|--------------------------------|---------------------------|----------------------------------|
| 1                                 | 12.85 (4.15 to 39.79)    | <b>10.81 (4.17 to 28.00)</b>   | 176.40 (46.68 to 666.52)  | <b>289.38 (34.94 to 2396.71)</b> |
| 2+                                | 114.98 (34.74 to 380.55) | <b>64.17 (21.68 to 189.97)</b> | 327.47 (42.01 to 2552.79) | <b>226.58 (20.12 to 2552.09)</b> |
| Don't know                        | 2.45 (0.28 to 21.39)     | 3.59 (0.27 to 47.66)           | 1.05 (0.04 to 27.35)      | 1.98 (0.09 to 44.70)             |
| <b>Currently smoke cigarettes</b> |                          |                                |                           |                                  |
| No                                | 1                        | 1                              | N/A                       | N/A                              |
| Yes                               | 7.20 (3.16 to 16.42)     | <b>4.62 (2.24 to 9.51)</b>     | N/A                       | N/A                              |
| <b>Currently consumes alcohol</b> |                          |                                |                           |                                  |
| No                                | 1                        | 1                              | 1                         | 1                                |
| Yes                               | 4.49 (3.27 to 6.16)      | <b>2.82 (1.47 to 5.40)</b>     | 16.73 (7.84 to 35.71)     | <b>8.88 (2.93 to 26.95)</b>      |
| <b>PSS-4</b>                      | 0.83 (0.77 to 0.89)      | <b>0.85 (0.72 to 0.99)</b>     | 0.91 (0.83 to 1.01)       | 1.10 (0.93 to 1.30)              |
| <b>PHQ-2</b>                      |                          |                                |                           |                                  |
| Negative                          | 1                        | 1                              | 1                         | 1                                |
| Positive                          | 0.66 (0.47 to 0.92)      | 0.85 (0.46 to 1.56)            | 0.68 (0.46 to 1.00)       | <b>0.36 (0.17 to 0.81)</b>       |
| <b>GAD-2</b>                      |                          |                                |                           |                                  |

|          |                     |                     |                     |                     |
|----------|---------------------|---------------------|---------------------|---------------------|
| Negative | 1                   | 1                   | 1                   | 1                   |
| Positive | 0.54 (0.42 to 0.70) | 0.61 (0.32 to 1.14) | 0.66 (0.44 to 0.99) | 0.42 (0.15 to 1.15) |
